# Supplementary material for: Precise regulation of bismuth active centres in alkaline earth ion-doped Ga2O3–GeO2 glasses by Bi–Al pre-combination
Source: Royal Society of Chemistry journal article supplement (doi:10.1039/d5tc01914a), 2025-01-01
Supplement: d5tc01914a1.pdf [file d5tc01914a1.pdf]

**Electronic Supplementary Information (ESI) for Journal of  
Materials Chemistry C.**

**Precise regulation of Bismuth Active Centres in alkaline  
earth ions-doped Ga<sub>2</sub>O<sub>3</sub>-GeO<sub>2</sub> glasses by Bi-Al pre-  
combination**

Qi Yang,<sup>ab</sup> Haoran Zhao,<sup>c</sup> Yushi Chu,<sup>\*abc</sup> Jing Ren,<sup>a</sup> and Jianzhong  
Zhang<sup>\*\*ab</sup>

<sup>a</sup>Key Laboratory of In-fiber Integrated Optics of Ministry of Education,  
College of Physics and Optoelectronic Engineering, Harbin Engineering  
University, Harbin 150001, China

<sup>b</sup>Key Laboratory of Photonic Materials and Devices Physics for Oceanic  
Applications, Ministry of Industry and Information Technology of China,  
College of Physics and Optoelectronic Engineering, Harbin Engineering  
University, Harbin 150001, China

<sup>c</sup> *Fiber Optical Sensing Center for Excellence, Yantai Research Institute,  
Harbin Engineering University, Yantai 264006, China*

<sup>\*</sup>Corresponding author. Email: chuyushi@hrbeu.edu.cn and  
zhangjianzhong@hrbeu.edu.cn

## **Contents**

**Fig.S1** Diagram of the device for measuring photostability at room temperature.

**Text.S1** Description of the photostability measurement process.

**Text.S2** Discussion of mechanism behind the difference in fluorescence lifetime between samples CaxA and CaxB.

## Supplementary Figure

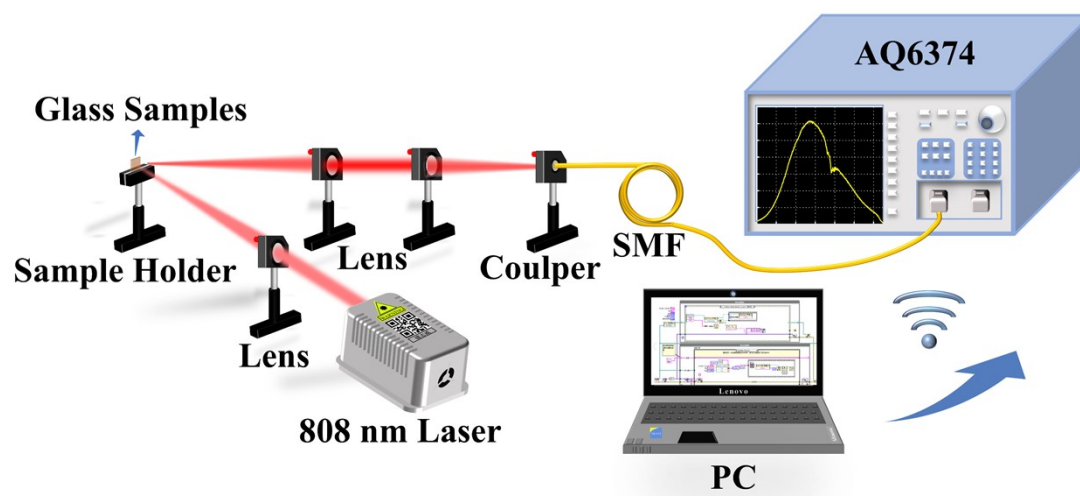

**Fig. S1** Diagram of the device for measuring photostability at room temperature.

## Supplementary Texts

### **Text. S1** Description of the photostability measurement process.

As shown in Fig. S1, the pump light emitted from the 808 nm semiconductor laser (operating at a current of 2A, corresponding to an output power of 1W) was focused onto the glass sample fixed by a sample holder via a lens. The NIR luminescence from the sample passed through a 4F optical system (comprising two lenses) and was focused into an optical coupler, then connected to an optical spectrum analyzer (AQ6374) via a single-mode fiber (SMF). The PC sent instructions to the AQ6374 via WiFi to record the spectra at specified intervals, thereby measuring the photostability of glass samples. Critically, during the measurement process, both the glass samples and all equipment were placed inside a dark box made of black plastic panels to effectively eliminate the interference of stray light.

**Text. S2** Discussion of mechanism behind the difference in fluorescence lifetime between samples CaxA and CaxB.

The emission spectra shown in Figure 2(a-b) indicate that when the Bi content is between 0.1-3.0 mol%, the emission intensity of sample CaxA is slightly higher than that of sample CaxB. This is because the number of BACs in sample CaxA is greater than that in sample CaxB, resulting in stronger interactions between BACs in sample CaxA compared to sample CaxB. This leads to a longer lifetime in sample CaxB than in CaxA. When the Bi content reaches 5.0 mol%, sample Ca5.0A undergoes concentration quenching, enhancing the interaction between BACs and Bi clusters, which accelerates fluorescence lifetime decay. Meanwhile, the emission of sample Ca5.0B continues to increase, almost doubling, so its lifetime remains longer than that of sample Ca5.0A.
